# Supplementary material
Source: PubMed Central journal article supplement (PMC4103598)
Supplement: supp_btu189_Supplementary_CP_v10.pdf [file supp_btu189_Supplementary_CP_v10.pdf]

## A change-point model for identifying 3'UTR switching by next-generation RNA sequencing

Supplementary Table 1.

Significant Gene Ontology terms in analysis of the Ni2013 dataset at FDR=0.05.

| <i>GO TERM</i>                            | <i>P Value</i> |
|-------------------------------------------|----------------|
| CYTOPLASMIC_PART                          | 3.64E-05       |
| POSITIVE_REGULATION_OF_CELLULAR_PROCESS   | 6.55E-05       |
| POSITIVE_REGULATION_OF_BIOLOGICAL_PROCESS | 1.18E-04       |
| CYTOPLASM                                 | 1.69E-04       |
| MITOCHONDRION                             | 1.91E-04       |
| REGULATION_OF_DEVELOPMENTAL_PROCESS       | 2.96E-04       |
| LIPID_BINDING                             | 4.19E-04       |
| NEGATIVE_REGULATION_OF_APOPTOSIS          | 4.91E-04       |
| ANTI_APOPTOSIS                            | 5.11E-04       |

Supplementary Table 2.

Significant Gene Ontology terms in analysis of the Fu2011 dataset at FDR=0.05.

| <i>GO TERM</i>               | <i>P Value</i> |
|------------------------------|----------------|
| SIGNAL_SEQUENCE_BINDING      | 4.66E-05       |
| ORGANELLE_PART               | 1.70E-04       |
| CYTOPLASM                    | 2.01E-04       |
| MACROMOLECULAR_COMPLEX       | 2.12E-04       |
| INTRACELLULAR_ORGANELLE_PART | 2.24E-04       |
| ENDOPLASMIC_RETICULUM        | 3.46E-04       |
| PEPTIDE_BINDING              | 4.03E-04       |
| CYTOPLASMIC_PART             | 4.50E-04       |

Supplementary Figure 1.

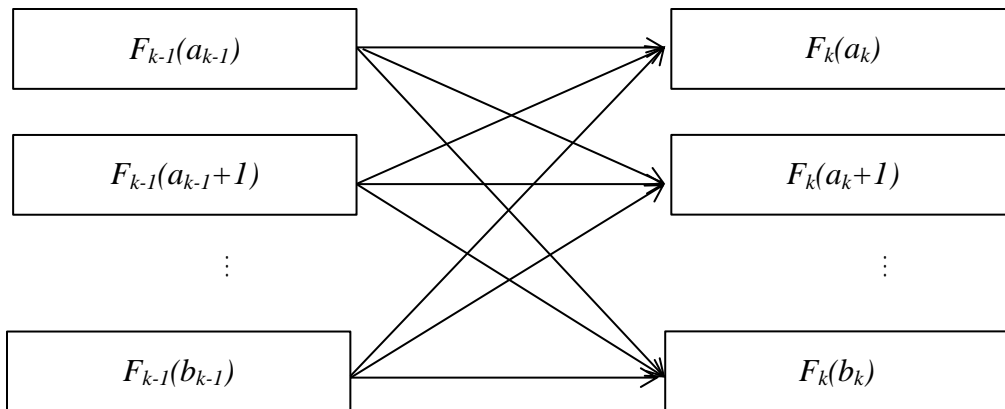

Figure S1. Implementation of the computation of the forward variable  $F_k(v)$  in terms of a lattice of locations  $k$ , and legitimate values  $v$  for  $S_k$ .
